# Supplementary material for: Cancers of unknown primary origin (CUP) are characterized by chromosomal instability (CIN) compared to metastasis of know origin
Source: PubMed Central journal article supplement (PMC4404593; doi:10.1186/s12885-015-1128-x), 2015-03-19
Supplement: 12885_2015_1128_MOESM8_ESM.pdf [file 12885_2015_1128_MOESM8_ESM.pdf]

| <b>Tumor</b>       | <b>Number</b> | <b>Percentage</b> |
|--------------------|---------------|-------------------|
| Bladder            | 1             | 2                 |
| Breast             | 7             | 15                |
| Cholangiocarcinoma | 9             | 19                |
| Cervix             | 3             | 6                 |
| Colon              | 5             | 10                |
| HCC                | 1             | 2                 |
| Kidney             | 3             | 6                 |
| Lung               | 6             | 13                |
| Ovary              | 4             | 8                 |
| Pancreas           | 4             | 8                 |
| Stomach            | 5             | 10                |

**Supplemental Table 3.** LDA predictions in CUP.
