# Supplementary material for: Cancers of unknown primary origin (CUP) are characterized by chromosomal instability (CIN) compared to metastasis of know origin
Source: Springer Nature journal article supplement (doi:10.1186/s12885-015-1128-x), 2015-03-18
Supplement: MOESM3 [file 9744044]

| Tumor Class              | 428 classifier<br>Training set |             | 428 classifier<br>Test set |             | 641 classifier<br>Combined set |             |
|--------------------------|--------------------------------|-------------|----------------------------|-------------|--------------------------------|-------------|
|                          | Samples (n)                    | Correct (%) | Samples (n)                | Correct (%) | Samples (n)                    | Correct (%) |
| Bladder                  | 40                             | 77.5        | 5                          | 100.0       | 45                             | 84.4        |
| Breast                   | 260                            | 95.8        | 52                         | 84.6        | 312                            | 94.2        |
| Cervix                   | 21                             | 71.4        | 15                         | 100.0       | 36                             | 80.6        |
| Cholangiocarcinoma       | 5                              | 40.0        | 4                          | 0           | 9                              | 22.2        |
| Colon/rectum             | 275                            | 96.0        | 96                         | 86.5        | 371                            | 94.6        |
| Hepatocellular carcinoma | 6                              | 66.7        | 5                          | 100.0       | 11                             | 90.9        |
| Kidney                   | 191                            | 97.4        | 62                         | 88.7        | 253                            | 96.4        |
| Lung                     | 95                             | 90.5        | 64                         | 96.9        | 159                            | 92.5        |
| Malignant melanoma       | 13                             | 76.9        | 46                         | 89.1        | 59                             | 91.5        |
| Ovary                    | 121                            | 90.1        | 183                        | 91.8        | 304                            | 90.5        |
| Pancreas                 | 19                             | 78.9        | 39                         | 84.6        | 58                             | 89.7        |
| Prostate                 | 60                             | 98.3        | 18                         | 77.8        | 78                             | 93.6        |
| Stomach/cardia           | 18                             | 72.2        | 21                         | 66.7        | 39                             | 84.6        |
| Testis                   | 6                              | 100.0       | 5                          | 80.0        | 11                             | 90.9        |
| Thyroid                  | 47                             | 87.2        | 14                         | 78.6        | 61                             | 82.0        |
| Uterus                   | 122                            | 90.2        | 12                         | 50.0        | 134                            | 85.8        |
| Normal                   | 167                            | 90.4        |                            |             | 268                            | 88.8        |
| Overall                  | 1466                           | 92.2        | 641                        | 87.4        | 2208                           | 91.3        |
| Primary tumours          | 1299                           | 92.4        | 391                        | 90.3        | 1690                           | 92.3        |
| Metastases               | -                              | -           | 250                        | 82.8        | 250                            | 86.8        |
| Normal tissue            | 167                            | 90.4        | 101                        | 72.2        | 268                            | 88.8        |

Table S2. Prediction of tumor classes with the 428 and 641 classifiers.
